# Supplementary material for: Phyloproteomic and functional analyses do not support a split in the genus Borrelia (phylum Spirochaetes)
Source: PubMed Central journal article supplement (PMC6375133; doi:10.1186/s12862-019-1379-2), 2019-02-13

# Additional file 4

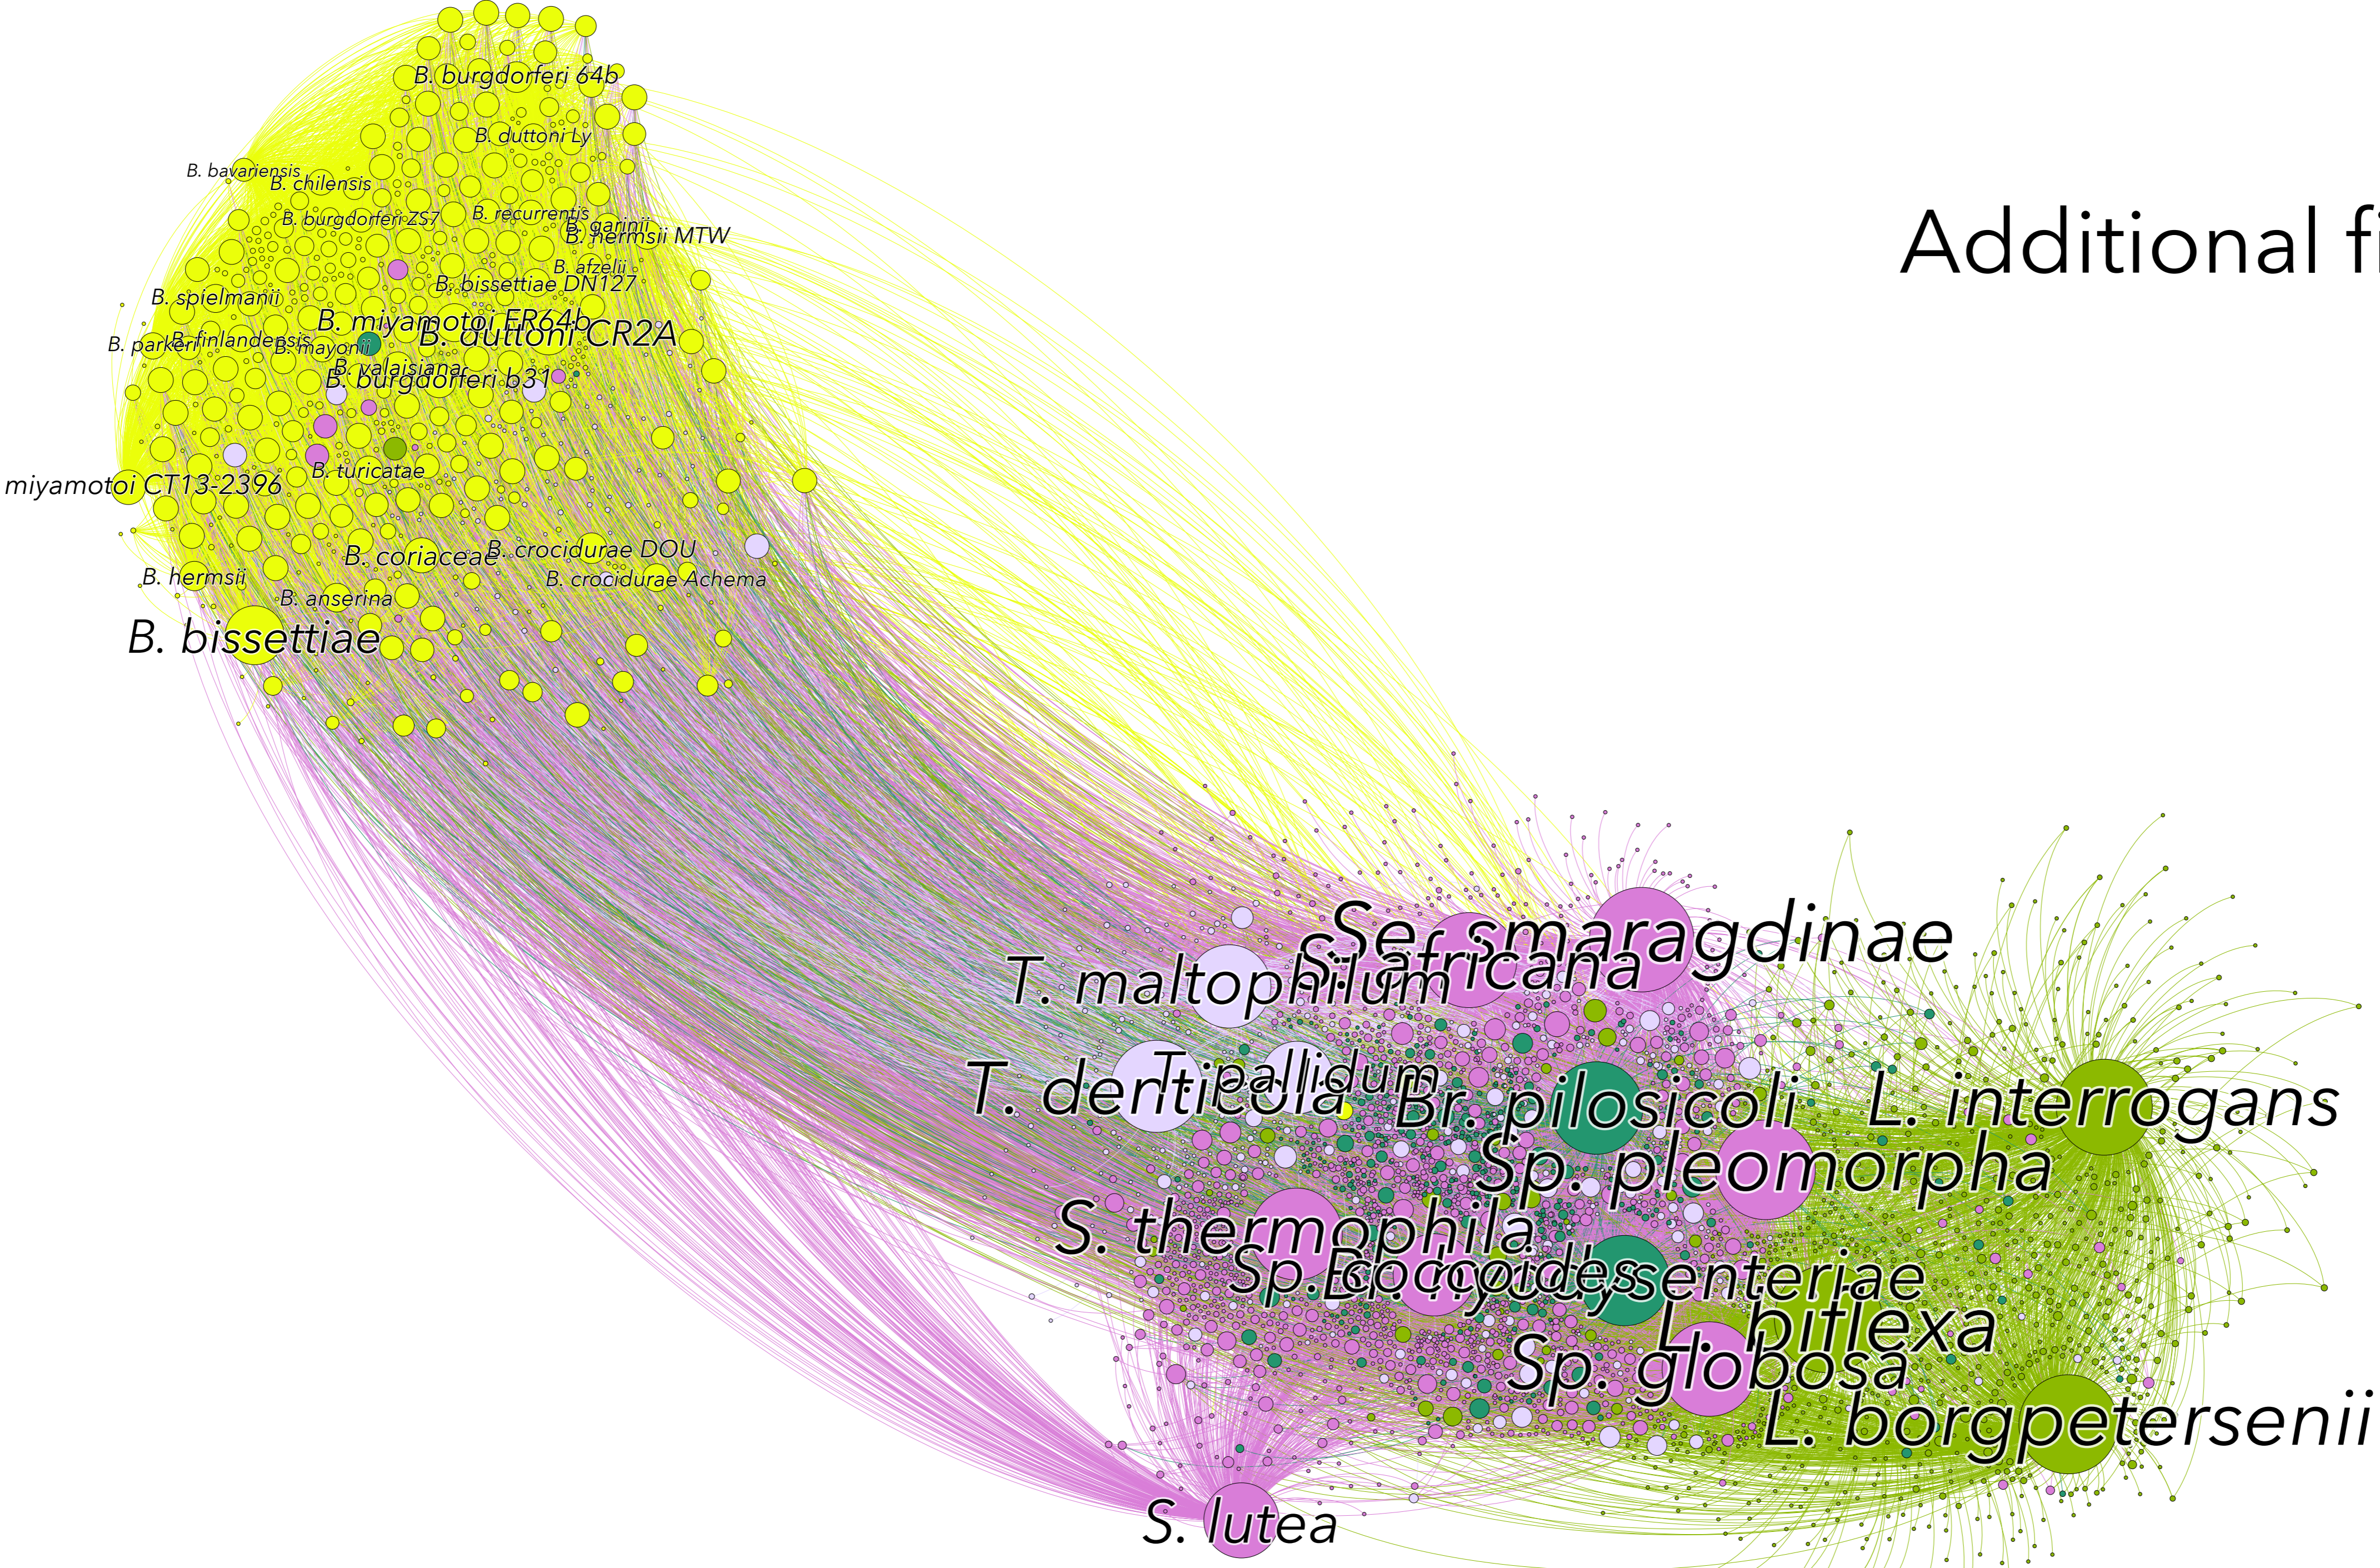

Supplement: 12862_2019_1379_MOESM4_ESM.pdf [file 12862_2019_1379_MOESM4_ESM.pdf]
